# Supplementary material
Source: PubMed Central journal article supplement (PMC1691815)

This is an electronic appendix to the paper by Weir 2004 Ice sheets promote speciation in boreal birds. *Proc. R. Soc. Lond. B* **271**, 1881-1887. (DOI 10.1098/rspb.2004.2803.)

Electronic appendices are refereed with the text. However, no attempt is made to impose a uniform editorial style on the electronic appendices.

---

## Electronic Appendix A: Supporting Online Materials and Methods

### *DNA Sequencing*

Total genomic DNA was extracted from muscle or liver tissue using a Qiagen tissue extraction kit. A fragment of the mitochondrial cytochrome b was amplified using the primers L14990 (5' - CCATCCAACATCTCMGCATGATGAAA) and H16065 (5' - GGAGTCTTCAGTCTYTGGTTTACAAGAC). For the PCR reaction we used 0.2 mM dNTPs, 1.5 mM MgCl<sub>2</sub>, 200 pM of each primer, 0.02 U/μl Taq polymerase and 20 - 100ng/μl of DNA. PCR conditions were as follows: denaturation at 93°C for 3 minutes, annealing between 50 and 55°C for 1 minute, extension at 72°C for 10 minutes. Amplified products were purified on Qiagen spin columns and sequenced using the BigDye cycle sequencing kit with the primer L14990. We sequenced one or more samples from each superspecies complex in the reverse direction using the primer H16065. Sequenced products were run on a ABI sequencer and aligned in Clustal X. Between 826 to 1006 bp of the sequenced product were used in each complex.

Sequences generated for this study have been deposited in Genbank (Table 1).

### *Sequences Used*

Sequences (and GenBank accession numbers) used for the analysis of the boreal avifauna in Table 2 are as follows: *Sphyrapicus* AF123532, U83296; *Empidonax* AF447597, AF447598, AY143200, AY143201, AY309248, AY309249; *Vireo* AF81963, AF81964, AF81967, AF81970, AF81978, AF81981, AF81984, AF81987, AF81991, AF81993, AF82000, AF82001; *Poecile* AF347948-AF347950, AY309247; *Catharus* AY049490, AY049495, AY049496, AY049502, AY049503; *Vermivora* AF256510, AY309245, AY309246, AY640935; *Oporornis* AF383029, AY309242-AY309244; *Passerella* U40162-U40166, U40168-U40171, AY138920, AY138922-AY138924, AY138927-AY138929, AY138933, AY138934. Additional *Sphyrapicus* sequences were obtained from Cicero and Johnson (1995) and *Dendroica* sequences (two sequences for each of three species) were provided by Irby Lovette.

Sequences used as outgroup taxa for phylogenetic analysis of superspecies complexes in Figure 1 are as follows: *Sphyrapicus* - *S. thyroideus* (*I*); *Empidonax* - *E. flavescens* (AY143191, AF447599, AF447600); *Vireo* - *V. flavifrons* (AF081961, AF081962); *Poecile* - *P. sclateri* (AF347947), *P. cincta* (AF347950), *P. gambeli* (AF347938), and *P. atricapillus* (AF347937); *Vermivora* - *V. celata* (AF489902, AY030123); *Oporornis* - *O. formosus* (AF383017) and *Geothlypis trichas* (AF383003); *Passerella* - *Junco hyemalis* (U26199, AY138936), *Zonotrichia capensis* (U40174, AF383139), *Spizella arborea* (U26190, AY138925) and *Pipilo chlorurus* (U26201, AY138935); *Dendroica* - *D. adelaidae* (AF256504).

Sequences used for the Sub-boreal avifauna (Figure 3, Table 3) are as follows: *Aphelocoma* U77335, AY030116; *Callipepla* AF028759, AF028762, AF028765, AF028768, AF028771; *Chaetura* AF168105, CVU50029, CVU50030; *Contopus* AF447607-AF447610; *Icterus spurius* group AY211197-AY211215; *Icterus galbula* group AF099290, AF099309; *Megascops* AF115864, AF294997, AJ004016; *Polioptila* AF027840-AF027843; *Parula* AY030122, AF256502, AF256503, AF256509; *Picoides* AF389322, AF389323, AF389326, AF389327; *Pipilo* AF092887, AF284075; *Piranga* AF290146, AF011759, AF011760, AF011773, AF011774; *Quiscalus* AF089055, AF089056, AF290171; *Sturnella* AF089063, AF089064, AF290164; *Toxostoma* AF130235, AF130237, AF130238, AF130240, AF287541, AF130242, AF287548, AF287560; *Tympanuchus* AF230179, AF230180; *Vireo* AF081960, AY030111.

Sequences used for the Neotropical avifauna (Figure 3, Table 4) are as follows: *Agelaius* AF089005, AF089013, AF290174; *Cacicus* AY117700-AY117704; *Columbina* AF182683, AF182684, AF483347; *Cranioleuca* AF053780-AF053782; *Icterus icterus* AF099296, AF099297, AF089031; *Megascops* AJ3904, AJ4039, AJ4040, AF295003, AF295004; *Petrochelidon* AF182380 AF182381 AF182388-AF182391; *Psarcolius* AF089053, AF472377-AF472381; *Ramphocelus* AF310048, RCU15723, U15717, U15719, U15720, U15722, U15724; *Selenidera* AF100552, AF123517, AF123518; *Tachycineta* AY052445-AY052448; *Xiphorhynchus* AY089791-AY089794, AY089799-AY089801, AY089803, AY089805, AY089807, AY089808, AY089812, AY089814-AY089816, AY089820, AY089824, AY089826, AY089827, AY089828, AY089830-AY089832; *Zenaida* AF182699, AF251533, AF251534.

## Literature Cited

1. Cicero, C. & Johnson, N. K. 1995 Speciation in sapsuckers (*Sphyrapicus*): III. Mitochondrial-DNA sequence divergence at the cytochrome-b locus. *Auk* **112**, 546-563.
2. Baker, M. B., Lopez-Medrano, E., Navarro-Siguenza, A. G., Rojas-Soto, O. R., & Omland, K. E. 2003 Recent speciation in the Orchard Oriole group: Divergence of *Icterus spurius spurius* and *Icterus spurius fuertesi*. *Auk* **120**, 848-859.
3. Aleixo, A. 2002 Molecular systematics and the role of the "várzea"- "terra firme" ecotone in the diversification of *Xiphorhynchus* woodcreepers (Aves: Dendrocolaptidae). *Auk* **119**, 621-640.

**Table 1** Tissue source, collecting locality and GenBank accession numbers for specimens sequenced in this study.

| <b>Taxon</b>                                | <b>Institution *</b> | <b>Tissue<br/>Number</b> | <b>Collection Locality</b>             | <b>GenBank<br/>accession<br/>numbers</b> |
|---------------------------------------------|----------------------|--------------------------|----------------------------------------|------------------------------------------|
| <i>Empidonax</i><br><i>occidentalis</i>     | MVZ                  | 167081                   | Custer Co., Colorado,<br>USA           | AY309249                                 |
| <i>Empidonax</i><br><i>occidentalis</i>     | MVZ                  | 167099                   | Apache Co., Arizona,<br>USA            | AY309248                                 |
| <i>Poecile rufescens</i>                    | CVM                  | 15432                    | Vancouver, British<br>Columbia, Canada | AY309247                                 |
| <i>Vermivora (r.)</i><br><i>ruficapilla</i> | LSUMNS               | B-27333                  | Baton Rouge, Louisiana,<br>USA         | AY640935                                 |
| <i>Vermivora</i><br><i>virginiae</i>        | UWBM                 | 56395                    | Canon City, Colorado,<br>USA           | AY309246                                 |
| <i>Vermivora (r.)</i><br><i>ridgewayi</i>   | MVZ                  | 173509                   | Plumas Co., California,<br>USA         | AY309245                                 |
| <i>Oporornis</i><br><i>philadelphia</i>     | KUNHM                | 2404                     | Topeka, Kansas, USA                    | AY309244                                 |
| <i>Oporornis tolmiei</i>                    | FMNH                 | 393953                   | [to be included ]                      | AY309242                                 |
| <i>Oporornis tolmiei</i>                    | FMNH                 | 393954                   | [to be included ]                      | AY309243                                 |

\*CVM = Cowan Vertebrate Museum, Vancouver; FMNH = Field Museum of Natural History, Chicago; LSUMNS = Louisiana State University Museum of Natural Science, Baton Rouge; KUNHM = Kansas University Natural History Museum; MVZ = Museum of Vertebrate Zoology, Berkley; UWBM = University of Washington Burke Museum, Seattle.

**Table 2** GTR-gamma divergence and dates of coalescence between members of species complexes restricted to the boreal forest of North America. (Cyt B, Cytochrome B.)

| Taxa Comparison                                                                                                                                                                               | GTR-gamma Divergence<br>(Standard Deviation) | Estimated Age of<br>Coalescence | Data                         |
|-----------------------------------------------------------------------------------------------------------------------------------------------------------------------------------------------|----------------------------------------------|---------------------------------|------------------------------|
| <i>Sphyrapicus varius</i> versus <i>S. nuchalis</i> / <i>S. ruber</i><br>(Yellow-bellied, Red-naped and Red-breasted Sapsucker)                                                               | 2.40% ( $\pm$ 0.11%)                         | 1,090,000                       | 711 bp Cyt B                 |
| <i>Sphyrapicus nuchalis</i> versus <i>S. ruber</i><br>(Red-naped, and Red-breasted Sapsucker)                                                                                                 | 0.71 % ( $\pm$ 0.00%)                        | 320,000                         | 711 bp Cyt B                 |
| <i>Empidonax occidentalis</i> versus <i>E. difficilis</i><br>(Cordilleran and Pacific-slope Flycatcher)                                                                                       | 0.87% ( $\pm$ 0.14%)                         | 390,000                         | 1006 bp Cyt B                |
| <i>Vireo plumbeus</i> versus <i>V. solitarius</i> / <i>V. cassinii</i><br>(Plumbeous, Blue-headed and Cassin's Vireo)                                                                         | 3.23% ( $\pm$ 0.31%)                         | 1,470,000                       | 1143 bp Cyt B                |
| <i>Vireo solitarius</i> versus <i>V. cassinii</i><br>(Blue-headed and Cassin's Vireo)                                                                                                         | 2.96% ( $\pm$ 0.17%)                         | 1,350,000                       | 1143 bp Cyt B                |
| <i>Poecile hudsonica</i> versus <i>P. rufescens</i><br>(Boreal and Chestnut-backed Chickadee)                                                                                                 | 3.60% ( $\pm$ 0.05%)                         | 1,640,000                       | 1001 bp Cyt B                |
| <i>Catharus minimus</i> versus <i>C. bicknelli</i><br>(Gray-cheeked and Bicknell's Thrush)                                                                                                    | 1.12% ( $\pm$ 0.22%)                         | 510,000                         | 1066 bp Cyt B                |
| <i>Vermivora (r.) ruficapilla</i> versus <i>V. virginiae</i> / <i>V. (r.) ridgwayi</i><br>(Nashville, Virginia's and Calaveras Warbler)                                                       | 2.14% ( $\pm$ 0.53%)                         | 970,000                         | 961 bp Cyt B                 |
| <i>Vermivora virginiae</i> versus <i>V. (ruficapilla) ridgwayi</i><br>(Virginia's and Calaveras Warbler)                                                                                      | 2.01% ( $\pm$ 0.19%)                         | 910,000                         | 961 bp Cyt B                 |
| <i>Dendroica virens</i> versus <i>D. townsendi</i> / <i>D. occidentalis</i><br>(Black-throated Green, Townsend's and Hermit Warbler)                                                          | 2.37% ( $\pm$ 0.16%)                         | 1,080,000                       | 1143 bp Cyt B                |
| <i>Dendroica townsendi</i> versus <i>D. occidentalis</i><br>(Townsend's versus Hermit Warbler)                                                                                                | 0.95% ( $\pm$ 0.12%)                         | 430,000                         | 1143 bp Cyt B                |
| <i>Oporornis philadelphia</i> versus <i>O. tolmiei</i><br>(Mourning and MacGillivray's Warbler)                                                                                               | 2.49% ( $\pm$ 0.07%)                         | 1,130,000                       | 946 bp Cyt B                 |
| <i>Passerella (i.) iliaca</i> versus <i>P. (i.) schistacea</i> , <i>P. (i.) megarhyncha</i> and <i>P. (i.) unalaschensis</i><br>(Eastern, Slate-colored, Thick-billed and Sooty Fox Sparrows) | 1.69% ( $\pm$ 0.22%)                         | 770,000                         | 433 bp Cyt B,<br>1030 bp ND2 |

|                                                                                                                                                              |                                       |                                                     |                              |
|--------------------------------------------------------------------------------------------------------------------------------------------------------------|---------------------------------------|-----------------------------------------------------|------------------------------|
| <i>Passerella (i.) schistacea</i> versus <i>P. (i.) megarhyncha</i> and <i>P. (i.) unalaschensis</i><br>(Slate-colored, Thick-billed and Sooty Fox Sparrows) | 1.57% ( $\pm$ 0.21%)                  | 720,000                                             | 433 bp Cyt B,<br>1030 bp ND2 |
| <i>Passerella (i.) megarhyncha</i> versus <i>P. (i.) unalaschensis</i><br>(Thick-billed and Sooty Fox Sparrows)                                              | 1.59% ( $\pm$ 0.22%)                  | 720,000                                             | 433 bp Cyt B,<br>1030 bp ND2 |
| <b>Mean (Standard Deviation of means)</b>                                                                                                                    | <b>1.98% (<math>\pm</math> 0.88%)</b> | <b>900,000</b><br><b>(<math>\pm</math> 400,000)</b> |                              |

---

**Table 3** GTR-gamma divergence and estimated dates of coalescence between members of species complexes restricted to sub-boreal habitats of North America. Cyt B, Cytochrome B.

| <b>Taxa Comparison</b>                                                                            | <b>GTR-gamma<br/>Divergence (Standard<br/>Deviation)</b> | <b>Estimated Age</b> | <b>Data</b>   |
|---------------------------------------------------------------------------------------------------|----------------------------------------------------------|----------------------|---------------|
| <i>Tympanuchus pallidicinctus</i> versus <i>T. cupido</i><br>(Lesser and Greater Prairie-Chicken) | 0.50%                                                    | 250,000              | 609 bp Cyt B  |
| <i>Callipepla californica</i> versus <i>C. gambelii</i><br>(California and Gambel's Quail)        | 2.46% ( $\pm$ 0.17%)                                     | 1,230,000            | 699 bp Cyt B  |
| <i>Megascops asio</i> versus <i>M. kennicottii</i><br>(Eastern and Western Screech-Owl)           | 9.37% ( $\pm$ 2.12%)                                     | 4,690,000            | 395 bp Cyt B  |
| <i>Picoides nuttallii</i> versus <i>P. scalaris</i><br>(Nuttall's and Ladder-backed Woodpecker)   | 1.05% ( $\pm$ 0.13%)                                     | 530,000              | 1028 bp Cyt B |
| <i>Contopus sordidulus</i> versus <i>V. virens</i><br>(Western and Eastern Wood-Pewee)            | 1.97% ( $\pm$ 0.14%)                                     | 990,000              | 1143 bp Cyt B |
| <i>Aphelocoma californica</i> versus <i>A. coerulescens</i><br>(Western and Florida Scrub-Jay)    | 5.68%                                                    | 2,840,000            | 1143 bp Cyt B |
| <i>Vireo gilvus</i> versus <i>V. leucophrys</i><br>(Warbling and Brown-throated Vireo)            | 6.66%                                                    | 3,330,000            | 1143 bp Cyt B |
| <i>Toxostoma cinereum</i> versus <i>T. bendirei</i><br>(Gray and Bendire's Thrasher)              | 1.46%                                                    | 730,000              | 433 bp Cyt B  |
| <i>Toxostoma curvirostre</i> versus <i>T. ocellatum</i><br>(Curve-billed and Ocellated Thrasher)  | 6.59% ( $\pm$ 0.50%)                                     | 3,300,000            | 433 bp Cyt B  |
| <i>Parula americana</i> versus <i>P. pitiayumi</i><br>(Northern and Tropical Parula)              | 4.68% ( $\pm$ 0.00%)                                     | 2,340,000            | 1143 bp Cyt B |
| <i>Piranga ludoviciana</i> versus <i>P. bidentata</i><br>(Western and Flame-colored Tanager)      | 5.38% ( $\pm$ 0.33%)                                     | 2,690,000            | 1073 bp Cyt B |

|                                                                                             |                        |                                                         |              |
|---------------------------------------------------------------------------------------------|------------------------|---------------------------------------------------------|--------------|
| <i>Pipilo maculatus</i> versus <i>P. erythrophthalmus</i><br>(Spotted and Eastern Towhee)   | 1.20%                  | 600,000                                                 | 433 bp Cyt B |
| <i>Quiscalus major</i> versus <i>Q. mexicanus</i><br>(Boat-tailed and Great-tailed Grackle) | 3.06% ( $\pm$ 0.00%)   | 1,530,000                                               | 881 bp Cyt B |
| <i>Icterus galbula</i> versus <i>I. abeillei</i><br>(Baltimore and Black-backed Oriole)     | 0.81%                  | 410,000                                                 | 876 bp Cyt B |
| <i>Icterus spurius</i> versus <i>I. fuertesi</i><br>(Orchard and Ochre Oriole)              | 0.19% ( $\pm$ 0.10%) * | 100,000                                                 | 925 bp Cyt B |
| <i>Sturnella neglecta</i> versus <i>S. magna</i><br>(Western and Eastern Meadowlark)        | 4.82% ( $\pm$ 0.00%)   | 2,410,000                                               | 893 bp Cyt B |
| <b>Mean (Standard Deviation of means)</b>                                                   |                        | <b>1,750,000</b><br><b>(<math>\pm</math> 1,360,000)</b> |              |

---

\* *Icterus spurius* and *I. fuertesi* share some haplotypes and are not reciprocally monophyletic as is expected for recently evolved species (Baker *et al.* 2003).

**Table 4** GTR-gamma divergence and estimated dates of coalescence between members of species complexes restricted to tropical habitats of the Neotropical lowlands. Cyt B, Cytochrome B.

| <b>Taxa Comparison</b>                                                                                 | <b>GTR-gamma Divergence<br/>(Standard Deviation)</b> | <b>Estimate Age</b> | <b>Data</b>   |
|--------------------------------------------------------------------------------------------------------|------------------------------------------------------|---------------------|---------------|
| <i>Zenaida asiatica</i> versus <i>Z. meloda</i><br>(White-winged and Pacific Dove)                     | 5.14% ( $\pm$ 0.05%)                                 | 2,570,000           | 1045 bp Cyt B |
| <i>Columbina squammata</i> versus <i>C. inca</i><br>(Scaled and Inca Dove)                             | 3.16% ( $\pm$ 0.22%)                                 | 1,580,000           | 1039 bp Cyt B |
| <i>Selenidera maculirostris</i> versus <i>S. gouldii</i><br>(Spot-billed and Golden-collared Toucanet) | 2.00%                                                | 1,000,000           | 925 bp Cyt B  |
| <i>Megascops usta</i> versus <i>M. watsonii</i><br>(Southern and Northern Tawny-bellied Screech-owl )  | 1.73% ( $\pm$ 0.63%)                                 | 865,000             | 393 bp Cyt B  |

|                                                                                                                                              |                      |           |               |
|----------------------------------------------------------------------------------------------------------------------------------------------|----------------------|-----------|---------------|
| <i>Xiphorhynchus spixii</i> versus <i>X. elegans</i> *<br>(Spix's and Elegant Woodcreeper)                                                   | 5.34% ( $\pm$ 0.17%) | 2,670,000 | 1003 bp Cyt B |
| <i>Xiphorhynchus chunchotambo</i> versus <i>X. padalotus</i> / <i>X. ocellatus</i><br>(Tschudi's, Chestnut-rumped and Ocellated Woodcreeper) | 5.63% ( $\pm$ 0.62%) | 2,820,000 | 964 bp Cyt B  |
| <i>Xiphorhynchus pardalotus</i> versus <i>X. ocellatus</i><br>(Chestnut-rumped and Ocellated Woodcreeper)                                    | 4.03% ( $\pm$ 0.38%) | 2,020,000 | 964 bp Cyt B  |
| <i>Xiphorhynchus erythropygius</i> versus <i>X. triangularis</i><br>(Spotted and Olive-backed Woodcreeper)                                   | 5.81% ( $\pm$ 0.68%) | 2,910,000 | 965 bp Cyt B  |
| <i>Xiphorhynchus guttatoides</i> versus <i>X. guttatus</i> / <i>susurrans</i><br>(Lafresnaye's, Buff-throated and Cocoa Woodcreeper)         | 7.25% ( $\pm$ 0.83%) | 3,630,000 | 1006 bp Cyt B |
| <i>Xiphorhynchus guttatus</i> versus <i>X. susurrans</i><br>(Buff-throated and Cocoa Woodcreeper)                                            | 4.39% ( $\pm$ 0.06%) | 2,200,000 | 1022 bp Cyt B |
| <i>Xiphorhynchus lachrymosus</i> versus <i>X. flavigaster</i><br>(Black-striped and Ivory-billed Woodcreeper)                                | 4.74% ( $\pm$ 0.57%) | 2,370,000 | 968 bp Cyt B  |
| <i>Cranioleuca pyrrhophia</i> versus <i>C. obsoleta</i><br>(Stripe-crowned and Olive Spinetail)                                              | 2.06% ( $\pm$ 1.26%) | 1,030,000 | 209 bp Cyt B  |
| <i>Tachycineta albiventer</i> versus <i>T. albilinea</i><br>(White-winged and Mangrove Swallow)                                              | 6.97%                | 3,490,000 | 936 bp Cyt B  |
| <i>Tachycineta meyeni</i> versus <i>T. leucorrhoa</i><br>(Chilean and White-rumped Swallow)                                                  | 4.12%                | 2,060,000 | 913 bp Cyt B  |
| <i>Petrochelidon fulva</i> versus <i>P. rufocolaris</i><br>(Cave and Chestnut-collared Swallow)                                              | 1.97% ( $\pm$ 0.13%) | 990,000   | 921 bp Cyt B  |
| <i>Ramphocelus carbo</i> versus <i>R. bresilius</i><br>(Silver-beaked and Brazilian tanager)                                                 | 4.35% ( $\pm$ 0.49%) | 2,180,000 | 1045 bp Cyt B |
| <i>Ramphocelus flammigerus</i> versus <i>R. passerinii</i> / <i>R. costaricensis</i><br>(Flame-rumped, Scarlet-rumped and Cherrie's Tanager) | 5.69% ( $\pm$ 0.26%) | 2,850,000 | 1045 bp Cyt B |
| <i>Ramphocelus passerinii</i> versus <i>R. costaricensis</i><br>(Scarlet-rumped and Cherrie's Tanager)                                       | 1.67% ( $\pm$ 0.08%) | 840,000   | 1045 bp Cyt B |
| <i>Agelaius cyanopus</i> versus <i>A. xanthophthalmus</i><br>(Unicolored and Pale-eyed Blackbird)                                            | 0.57% ( $\pm$ 0.00%) | 290,000   | 879 bp Cyt B  |
| <i>Icterus icterus</i> versus <i>I. jamacaii</i> / <i>I. croconotus</i><br>(Venezuelan, Campo and Orange-backed Troupial)                    | 4.72% ( $\pm$ 0.60%) | 2,360,000 | 890 bp Cyt B  |
| <i>Icterus jamacaii</i> versus <i>I. Croconotus</i><br>(Campo and Orange-backed Troupial)                                                    | 1.96%                | 980,000   | 890 bp Cyt B  |



|                                                                                                                           |                      |                                   |              |
|---------------------------------------------------------------------------------------------------------------------------|----------------------|-----------------------------------|--------------|
| <i>Cacicus cela</i> versus <i>C. vitellinus</i><br>(Yellow-rumped and Saffron-rumped Cacique)                             | 4.86% ( $\pm$ 0.13%) | 2,430,000                         | 906 bp Cyt B |
| <i>Psarocolius montezuma</i> versus <i>P. bifasciatus</i> / <i>P. yuracares</i><br>(Montezuma, Para and Olive Oropendola) | 1.76% ( $\pm$ 0.16%) | 880,000                           | 920 bp Cyt B |
| <i>Psarocolius bifasciatus</i> versus <i>P. yuracares</i><br>(Para and Olive Oropendola)                                  | 0.87% ( $\pm$ 0.04%) | 440,000                           | 920 bp Cyt B |
| <b>Mean (Standard Deviation)</b>                                                                                          |                      | <b>1,890,000</b>                  |              |
|                                                                                                                           |                      | <b>(<math>\pm</math> 970,000)</b> |              |

---

\* For current taxonomic treatment of *Xiphorhynchus* see Aleixo (2002).

**Figure 4 (Overleaf.)** Approximate geographic distribution of boreal (black), sub-boreal (dotted) and lowland Neotropical (horizontal) avifaunas compared in this study. The Tropic of Cancer, Equator, and Tropic of Capricorn are indicated by the three dotted lines from north to south respectively.

Figure 4

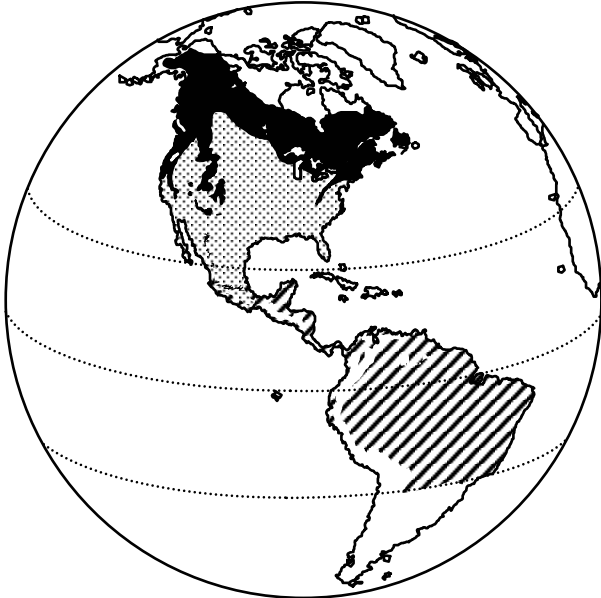

Supplement: 15347509s01.pdf [file 15347509s01.pdf]
